# Supplementary material
Source: HighWire-hosted journal article supplement (https://erj.ersjournals.com/content/55/4/1902277)
Supplement: inline-supplementary-material-1 [file inline-supplementary-material-1.pdf]

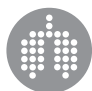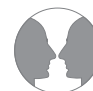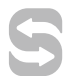

SHAREABLE PDF

# The utility and safety of linear endobronchial ultrasound-guided transbronchial needle aspiration (EBUS-TBNA) in the paediatric population

Haider Al-Najjar <sup>1</sup>, Ronan Breen<sup>2</sup>, George Santis<sup>2</sup> and Omendra Narayan<sup>3</sup>

**Affiliations:** <sup>1</sup>Respiratory Dept, Manchester University NHS Foundation Trust, Manchester, UK. <sup>2</sup>Thoracic Medicine Dept, Guy's and St Thomas' NHS Foundation Trust, London, UK. <sup>3</sup>Paediatric Respiratory Dept, Royal Manchester Children's Hospital, Manchester, UK.

**Correspondence:** Haider Al-Najjar, Respiratory Dept, Manchester University NHS Foundation Trust, Oxford Road, Manchester M13 9WL, UK. E-mail: Haider.al-najjar@mft.nhs.uk

@ERSpublications

**This first European case series demonstrates that EBUS-TBNA, well established in the diagnosis of mediastinal and hilar adenopathy in adults, is a safe and useful diagnostic alternative to invasive surgical biopsy in the paediatric population** <http://bit.ly/389Uvq4>

**Cite this article as:** Al-Najjar H, Breen R, Santis G, *et al.* The utility and safety of linear endobronchial ultrasound-guided transbronchial needle aspiration (EBUS-TBNA) in the paediatric population. *Eur Respir J* 2020; 55: 1902277 [<https://doi.org/10.1183/13993003.02277-2019>].

This single-page version can be shared freely online.

## *To the Editor:*

Endobronchial ultrasound-guided transbronchial needle aspiration (EBUS-TBNA) in adults is an essential tool for investigating mediastinal and hilar lymphadenopathy. It is now integral to the diagnostic and staging algorithm for lung cancer [1], as well as the diagnosis of other malignancies, lymphoma and non-malignant granulomatous conditions, such as sarcoidosis and tuberculosis. The comparable diagnostic yield, along with decreased complications, has reduced the requirement for previously standard surgical biopsy sampling [2, 3].
